# Supplementary material for: Computational learning on specificity-determining residue-nucleotide interactions
Source: PubMed Central journal article supplement — Nucleic Acids Res. 2015 Nov 2;43(21):10180–9. doi: 10.1093/nar/gkv1134 (PMC4666365; doi:10.1093/nar/gkv1134), 2015-11-02
Supplement: supp_gkv1134_nar-02477-n-2015-File003.pdf [file supp_gkv1134_nar-02477-n-2015-File003.pdf]

# Supplementary: Computational Learning on Specificity-Determining Residue-Nucleotide Interactions

Ka-Chun Wong<sup>1</sup> et al. \*

<sup>1</sup>Department of Computer Science, City University of Hong Kong, Kowloon Tong, Hong Kong

## Covariation Analysis Implementation

In the implementation level as shown in Figure S1, we have a matrix for each side. On the DBD sequence side, each row corresponds to a DBD sequence while each column corresponds to the presence of an amino acid residue at an aligned position. On the DNA motif matrix side, each row corresponds to the flattened vector of an aligned DNA motif matrix. We traverse and compute all the possible pair-wise correlations between each column of the DBD numeric matrix and each column of the DNA numeric matrix, resulting in a correlation matrix (heat map). Exact p-value is computed for each Spearman correlation value. The correlation matrix entries with p-value  $\geq 0.01$  are discarded and assigned zeros. The resultant correlation matrix (heat map) is then clustered for each DBD family. We can observe that there are statistically significant co-variations between residues and nucleotides. To visualize the co-variations, we can obtain a binding pair of protein sequence and DNA sequence from PDB and select the corresponding columns and rows to form its own correlation sub-matrix (heat map) from the correlation matrix (heat map) as shown from Step 7 to Step 8 on Figure S1.

## Time Complexity Analysis

The overall approach is summarized in Figure 1, which can be divided into training and testing.

**Training Procedure** For the model training part of each domain as shown in Figure 1, time complexity is analyzed step by step. (Steps A and B)  $N'$  training protein-DNA binding sequence pairs with their structural information are retrieved from PDB. The average lengths of the protein sequences and DNA sequences of the pairs are indicated as  $L_{aa}$  and  $L_{dna}$  respectively. (Step C) CD-HIT redundancy removal on the protein sequences of the training protein-DNA binding sequence pairs causes  $O(N'L_{aa})$ , resulting in  $N$  non-redundant pairs. (Step D) Let the average number of atoms of amino acids and those of nucleotides be  $\alpha_{aa}$  and  $\alpha_{dna}$  respectively. All the possible pair-wise residue-nucleotide interactions are examined with their structural atom information in this step, resulting in the time complexity  $O(NL_{aa}\alpha_{aa}L_{dna}\alpha_{dna})$ .

After that,  $NL_{aa}L_{dna}$  labeled residue-nucleotide interactions are obtained. (Step E) The isolation of class labels incurs  $O(NL_{aa}L_{dna})$ . (Steps F to H) We have  $M$  protein-DNA binding sequence pairs from the CISBP database. In this study, we have chosen MUSCLE to conduct the multiple sequence alignment with the time complexities  $O(M^4 + ML_{aa}^2)$  and  $O(M^4 + ML_{dna}^2)$  for protein and DNA respectively (1). (Step I) MUSCLE is applied again to align the training sequence pairs to the multiple sequence alignment profile pairs constructed in the last step (step H), resulting in  $N * O(2^4 + 2L_{aa}^2)$  and  $N * O(2^4 + 2L_{dna}^2)$  for protein and DNA respectively (1). (Step J) To build  $NL_{aa}L_{dna}$  feature vectors for  $NL_{aa}L_{dna}$  labeled residue-nucleotide interactions with the help of the alignment profiles built in the previous steps, different feature building methods are involved. The mapping methods require constant time complexity, resulting in  $O(NL_{aa}L_{dna})$  in total; The feature building which involves looking up the alignment profiles built causes  $O(M^2)$  at most, resulting in  $O(NL_{aa}L_{dna}M^2)$  in total. Note that the feature building which involves whole alignment length lookups can be pre-computed in a single pass first. (Steps J and K) Given  $NL_{aa}L_{dna}$  feature vectors with  $F$  input features, a classification model is trained. In this study, we have chosen Random Forest as the model. For its building,  $NL_{aa}L_{dna}$  data vectors with  $F$  input features are given for training (building). For each decision tree, a random set of  $R$  input features is used for node split. To build a random decision tree, assuming the average depth of those decision trees is  $D$ , time complexity  $O(DNL_{aa}L_{dna}R)$  complexity is involved. If the Random Forest model has  $T$  trees, the total model building time complexity is  $O(TDNL_{aa}L_{dna}R)$ .

In summary, the overall time complexity of model training is  $O(N'L_{aa}) + O(NL_{aa}\alpha_{aa}L_{dna}\alpha_{dna}) + O(NL_{aa}L_{dna}) + O(M^4 + ML_{aa}^2) + O(M^4 + ML_{dna}^2) + N * O(2^4 + 2L_{aa}^2) + N * O(2^4 + 2L_{dna}^2) + O(NL_{aa}L_{dna}) + O(NL_{aa}L_{dna}M^2) + O(TDNL_{aa}L_{dna}R)$ . If only dominant complexities are counted, it can be written as  $O(N'L_{aa}) + O(NL_{aa}\alpha_{aa}L_{dna}\alpha_{dna}) + O(M^4 + ML_{aa}^2) + O(M^4 + ML_{dna}^2) + O(NL_{aa}^2) + O(NL_{dna}^2) + O(NL_{aa}L_{dna}M^2) + O(TDNL_{aa}L_{dna}R)$ .

\*To whom correspondence should be addressed. Email: kc.w@cityu.edu.hk

*Testing Procedure* Given an input protein-DNA binding sequence pair of lengths  $l_{aa}$  and  $l_{dna}$ , we aim at applying the corresponding trained model to predict its interactions for model testing as shown in Figure 1. Similar to the model training section, time complexity is analyzed step by step. (Steps 1 and 2) The time complexity of the steps 1 and 2 depends on the actual implementation of the PFam database. Nonetheless, most of the queries have already been pre-computed by the PFam database. We can safely assume constant complexity here (2). (Steps 3 to 5) The steps have already been computed in the model training part. (Step 6) MUSCLE is applied again to align the input sequence pair to the multiple sequence alignment profile pairs constructed in the step 5, resulting in  $O(2^4 + 2L_{aa}^2)$  and  $O(2^4 + 2L_{dna}^2)$  for protein and DNA respectively (1). (Step 7) As elaborated in the model training section, the time complexity of feature vector building for a protein-DNA binding sequence pair is  $O(l_{aa}l_{dna}M^2)$ . (Step 8) For the classification (prediction) part, we just need to traverse all the  $T$  decision trees of the Random Forest classifier which we have trained. Assuming the average depth of those decision trees is  $D$ , the time complexity to obtain the prediction score is  $O(TD)$  for each possible residue-nucleotide interaction, resulting in  $O(l_{aa}l_{dna}TD)$  in total for all the  $l_{aa}l_{dna}$  possible residue-nucleotide interactions on the input protein-DNA binding sequence pair.

In summary, the overall time complexity of model testing is  $O(2^4 + 2L_{aa}^2) + O(2^4 + 2L_{dna}^2) + O(l_{aa}l_{dna}M^2) + O(l_{aa}l_{dna}TD)$ .

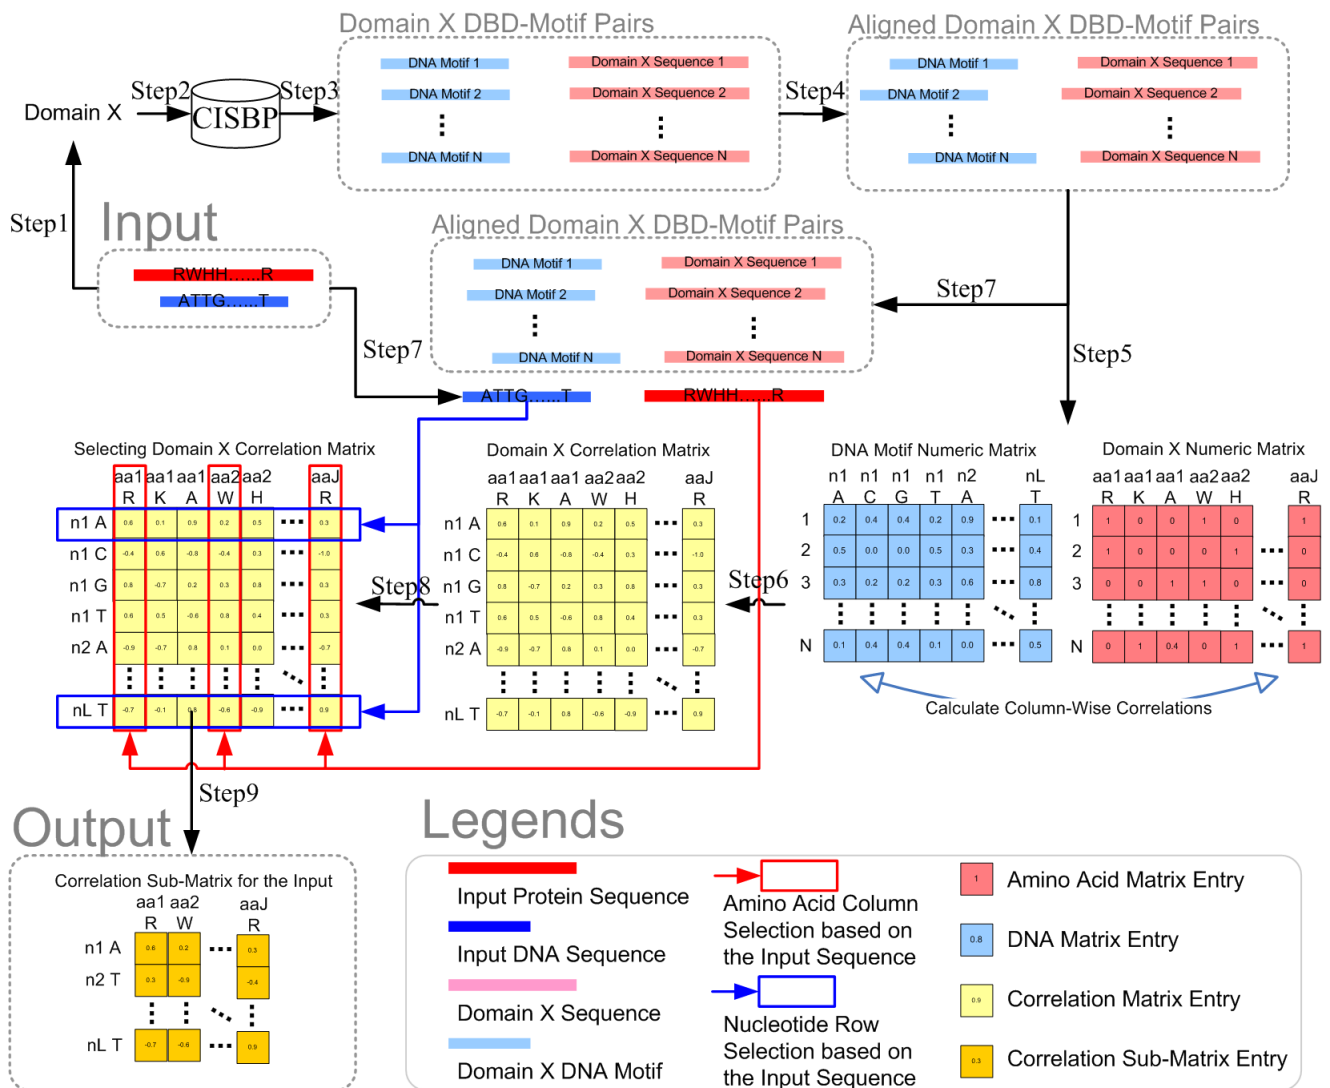

**Figure S1.** Constructing the correlation sub-matrix (heat map) for an input pair of protein-DNA binding sequences. Step1: We identify which DBD domain the input pair of protein-DNA binding sequence belongs to (Domain X in this example). Steps 2 and 3: The entire Domain X sequences and the corresponding DNA motifs are retrieved from CISBP. Step 4: The retrieved domain X sequences and the corresponding DNA motifs are aligned. Step5: The DNA motif alignment is transformed into a numeric matrix whereas the domain X sequence alignment is transformed into a binary matrix. Step6: Correlations are calculated between the two matrices. Step7: The input sequence pair is aligned to the existing domain X family alignment to identify their own aligned positions using MUSCLE and STAMP for protein and DNA sides respectively. Step8: The correlation matrix rows and columns corresponding to the input are selected. Step9: The selected rows and columns are concatenated to form the correlation sub-matrix (heat map) for the input.

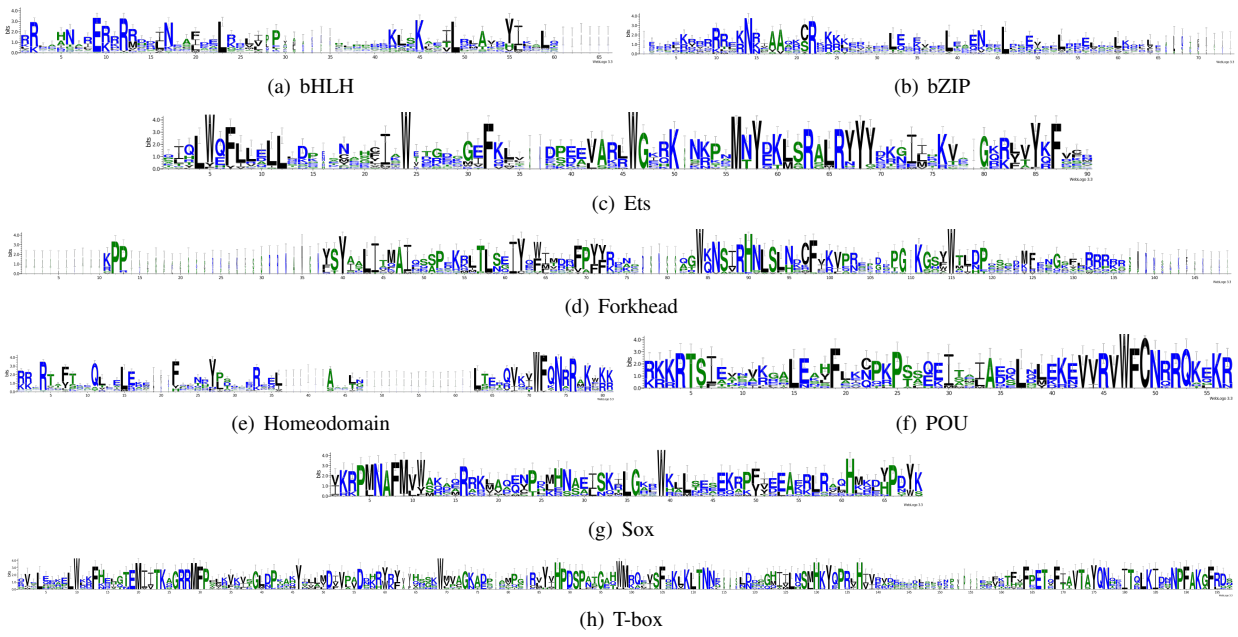

**Figure S2.** Sequence logos for the DNA-binding domain (DBD) sequences used

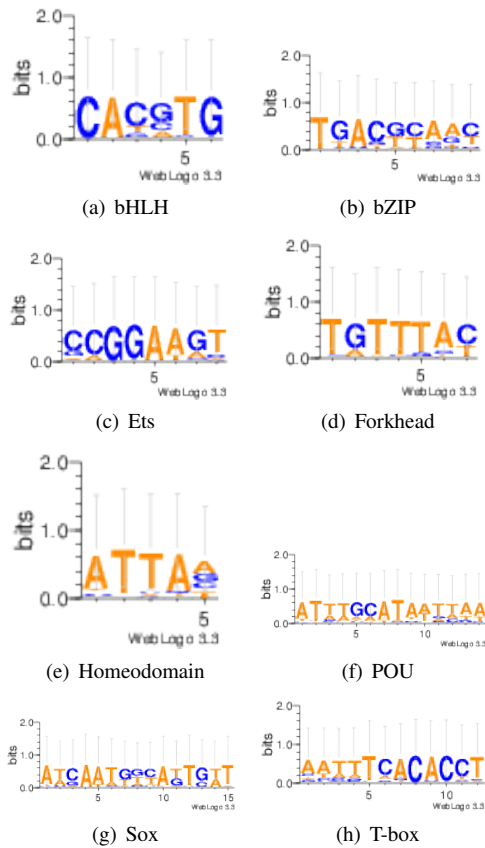

**Figure S3.** Sequence logos for the DNA binding sites of the DNA-binding domain sequences used

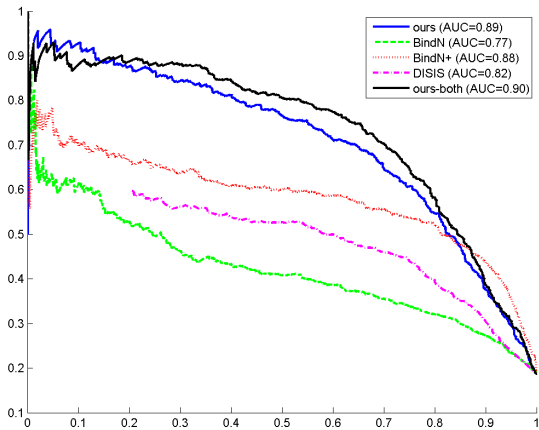

**Figure S4.** Precision-Recall (PRC) curves for our proposed methods (in Blue and Black), BindN (in Green), BindN+(in Red), and DISIS (in Violet) on the entire DBD families.

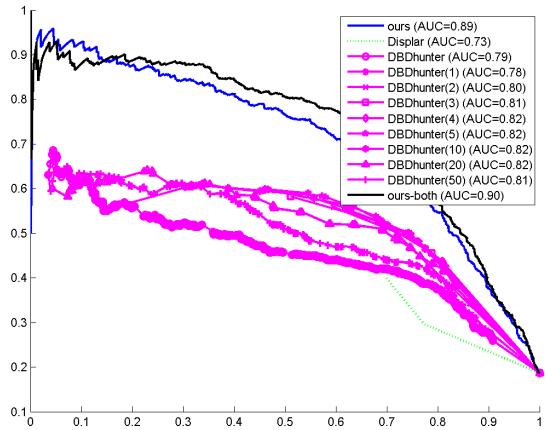

**Figure S5.** Precision-Recall curves for our proposed methods (in Blue and Black), DBD-Hunter (in Violet), DISPLAR (in Green) on the entire DBD families.

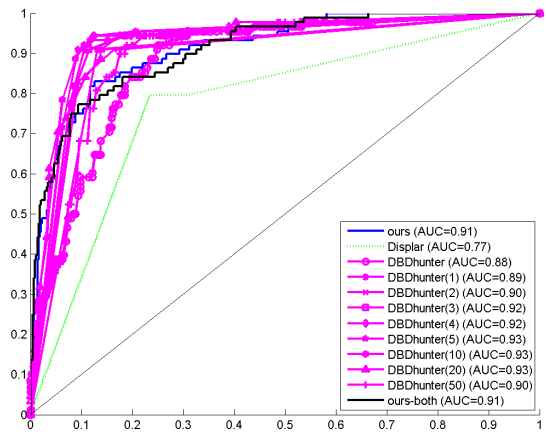

**Figure S6.** Receiver Operating Characteristic (ROC) curves for our proposed methods (in Blue and Black), DBD-Hunter (in Violet), DISPLAR (in Green) on bHLH family.

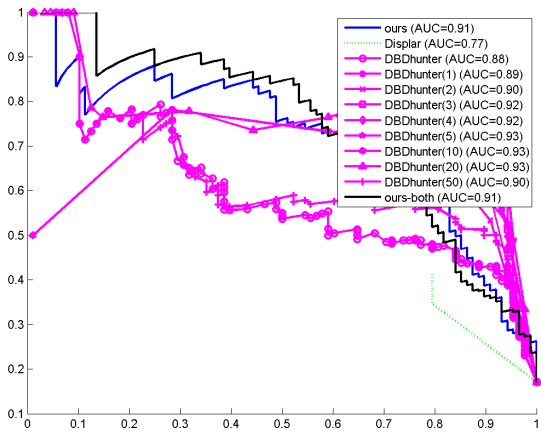

**Figure S7.** Precision-Recall (PRC) curves for our proposed methods (in Blue and Black), DBD-Hunter (in Violet), DISPLAR (in Green) on bHLH family.

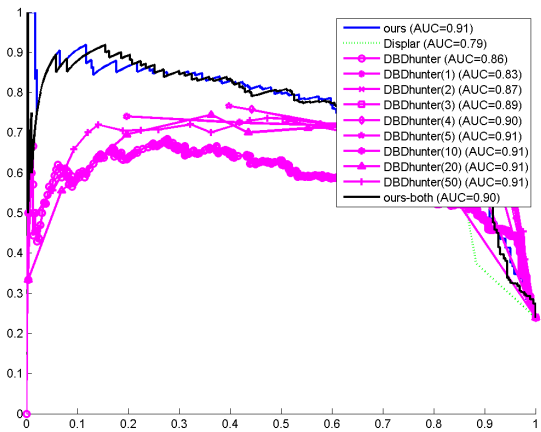

**Figure S9.** Precision Recall curves for our proposed methods (in Blue and Black), DBD-Hunter (in Violet), DISPLAR (in Green) on Homeodomain family.

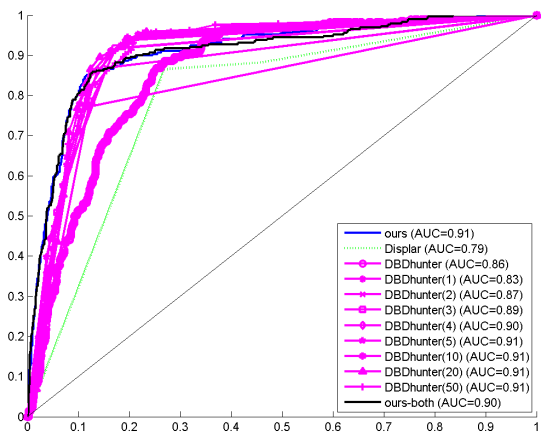

**Figure S8.** Receiver Operating Characteristic (ROC) curves for our proposed methods (in Blue and Black), DBD-Hunter (in Violet), DISPLAR (in Green) on Homeodomain family.

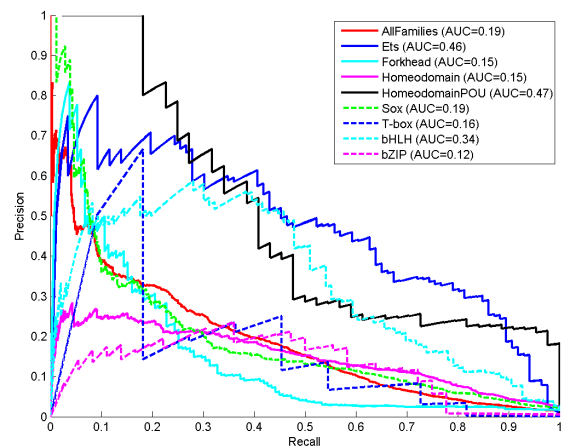

**Figure S10.** Precision Recall (PRC) curves for our proposed method on the DBD family data. Each line corresponds to a DBD family.

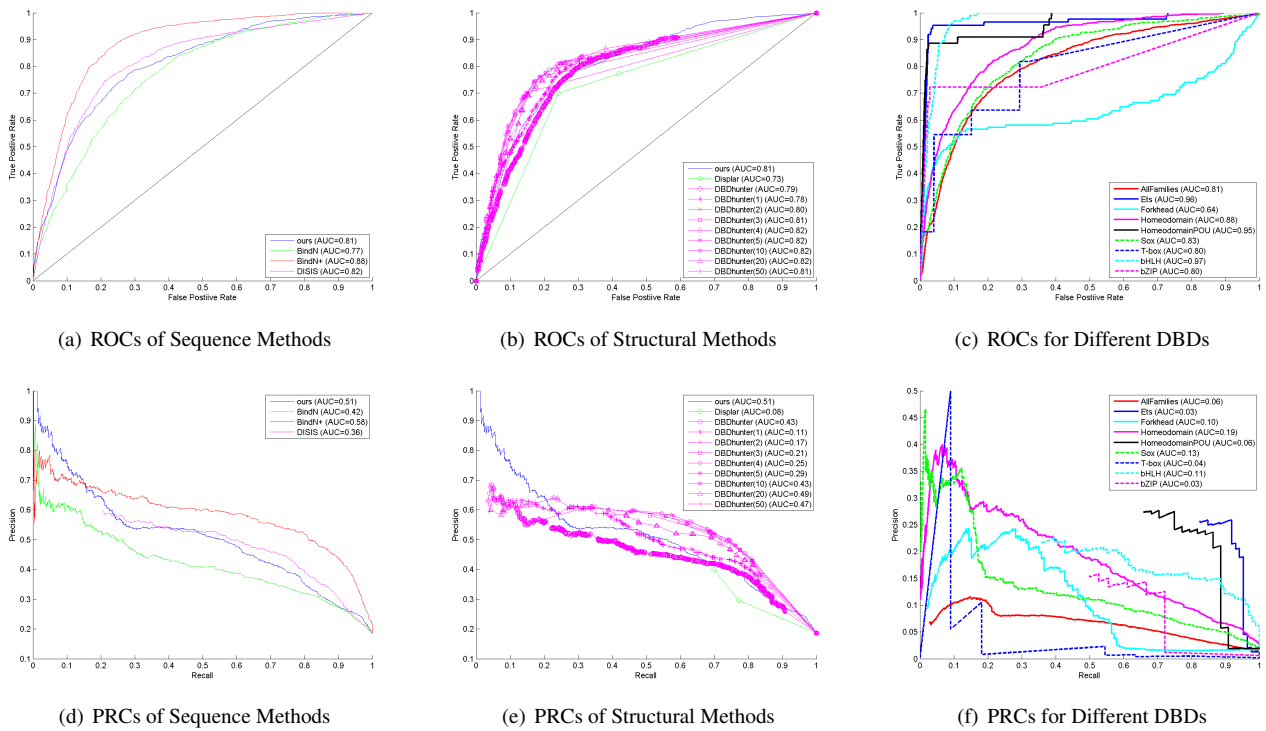

Figure S11. The overall performance if Naive Bayes is used instead of Random Forest.

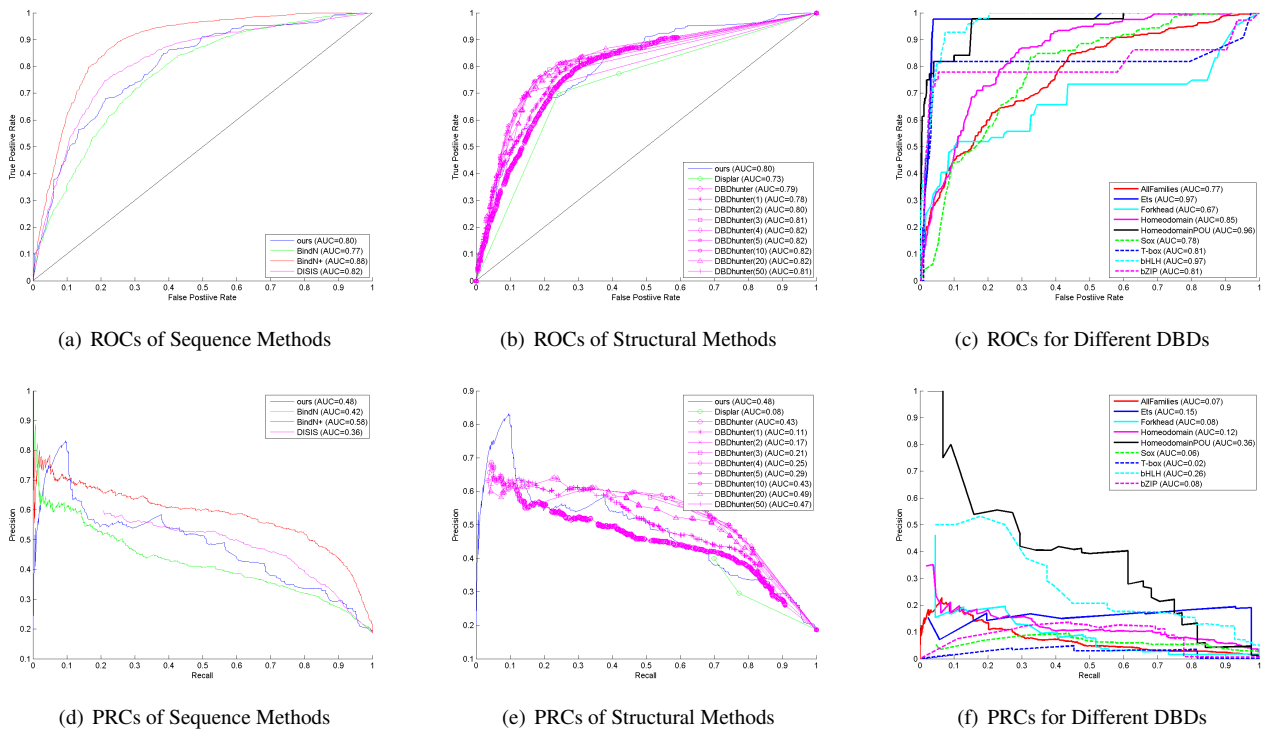

Figure S12. The overall performance if Adaboost M1 is used instead of Random Forest.

S8 *Nucleic Acids Research*, 2009, Vol. 37, No. 12

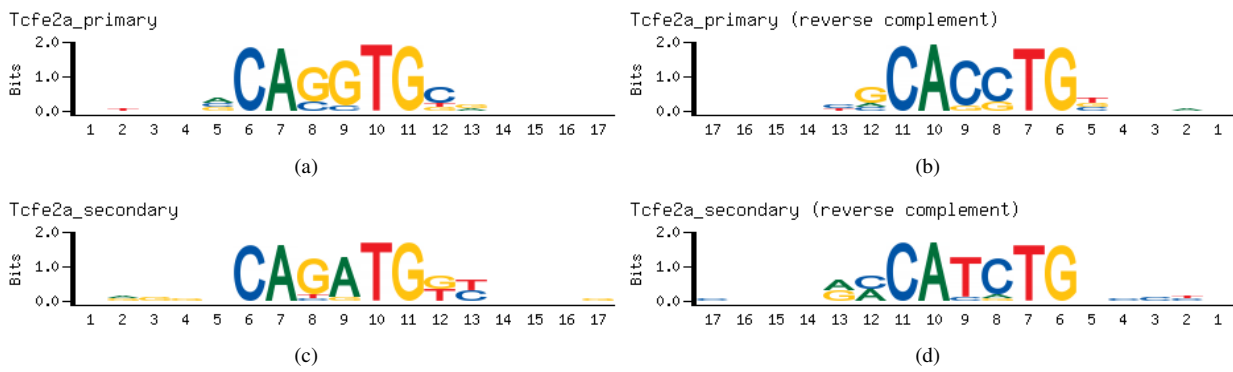

**Figure S13.** Sequence logos measured on the bHLH DBD domain of the transcription factor E2-alpha (UniProt code: P21677, UniPROBE code: Tcfe2a) (3)



**Table S1.** Statistics of human DNA-binding domains collected from CISBP (v0.71)

| DNA-Binding Domain Family | DBD Sequence-DNA Motif Matrix Pairs |
|---------------------------|-------------------------------------|
| T-box                     | 13                                  |
| POU                       | 15                                  |
| Sox                       | 16                                  |
| Forkhead                  | 25                                  |
| Ets                       | 26                                  |
| bZIP                      | 39                                  |
| bHLH                      | 48                                  |
| Homeodomain               | 142                                 |

**Table S2.** Statistics of extracted DBD sequences from PDB

| DNA-Binding Domain Family | DBD Sequence-DNA Sequence Pairs |
|---------------------------|---------------------------------|
| T-box                     | 2                               |
| POU                       | 4                               |
| Sox                       | 16                              |
| Forkhead                  | 6                               |
| Ets                       | 8                               |
| bZIP                      | 5                               |
| bHLH                      | 10                              |
| Homeodomain               | 22                              |

S10 *Nucleic Acids Research*, 2009, Vol. 37, No. 12

**Table S3.** List of input features.

| Feature                           | Description                                                                                                                                        | Data Type              |
|-----------------------------------|----------------------------------------------------------------------------------------------------------------------------------------------------|------------------------|
| aa-10                             | The 10th preceding residue                                                                                                                         | A,R,N,...,V,-          |
| aa-9                              | The 9th preceding residue                                                                                                                          | A,R,N,...,V,-          |
| aa-8                              | The 8th preceding residue                                                                                                                          | A,R,N,...,V,-          |
| aa-7                              | The 7th preceding residue                                                                                                                          | A,R,N,...,V,-          |
| aa-6                              | The 6th preceding residue                                                                                                                          | A,R,N,...,V,-          |
| aa-5                              | The 5th preceding residue                                                                                                                          | A,R,N,...,V,-          |
| aa-4                              | The 4th preceding residue                                                                                                                          | A,R,N,...,V,-          |
| aa-3                              | The 3rd preceding residue                                                                                                                          | A,R,N,...,V,-          |
| aa-2                              | The 2nd preceding residue                                                                                                                          | A,R,N,...,V,-          |
| aa-1                              | The 1st preceding residue                                                                                                                          | A,R,N,...,V,-          |
| aa1                               | The 1st succeeding residue                                                                                                                         | A,R,N,...,V,-          |
| aa2                               | The 2nd succeeding residue                                                                                                                         | A,R,N,...,V,-          |
| aa3                               | The 3rd succeeding residue                                                                                                                         | A,R,N,...,V,-          |
| aa4                               | The 4th succeeding residue                                                                                                                         | A,R,N,...,V,-          |
| aa5                               | The 5th succeeding residue                                                                                                                         | A,R,N,...,V,-          |
| aa6                               | The 6th succeeding residue                                                                                                                         | A,R,N,...,V,-          |
| aa7                               | The 7th succeeding residue                                                                                                                         | A,R,N,...,V,-          |
| aa8                               | The 8th succeeding residue                                                                                                                         | A,R,N,...,V,-          |
| aa9                               | The 9th succeeding residue                                                                                                                         | A,R,N,...,V,-          |
| aa10                              | The 10th succeeding residue                                                                                                                        | A,R,N,...,V,-          |
| nt-5                              | The 5th preceding nucleotide                                                                                                                       | A,C,G,T,-              |
| nt-4                              | The 4th preceding nucleotide                                                                                                                       | A,C,G,T,-              |
| nt-3                              | The 3rd preceding nucleotide                                                                                                                       | A,C,G,T,-              |
| nt-2                              | The 2nd preceding nucleotide                                                                                                                       | A,C,G,T,-              |
| nt-1                              | The 1st preceding nucleotide                                                                                                                       | A,C,G,T,-              |
| nt1                               | The 1st succeeding nucleotide                                                                                                                      | A,C,G,T,-              |
| nt2                               | The 2nd succeeding nucleotide                                                                                                                      | A,C,G,T,-              |
| nt3                               | The 3rd succeeding nucleotide                                                                                                                      | A,C,G,T,-              |
| nt4                               | The 4th succeeding nucleotide                                                                                                                      | A,C,G,T,-              |
| nt5                               | The 5th succeeding nucleotide                                                                                                                      | A,C,G,T,-              |
| aa                                | The current residue                                                                                                                                | A,R,N,...,Y,V          |
| nt                                | The current nucleotide                                                                                                                             | A,C,G,T                |
| aa-nt                             | The current residue and nucleotide pair                                                                                                            | AA,RA,NA,...,YT,VT     |
| hydropathyIndex                   | Hydropathy Index of the current residue                                                                                                            | numeric                |
| mass                              | Mass of the current residue                                                                                                                        | numeric                |
| npsa                              | Non-Polar Surface Area of the current residue                                                                                                      | numeric                |
| polarity                          | Polarity of the current residue                                                                                                                    | n,p,pp,pp              |
| residueBurial                     | Estimated Hydrophobic Effect For Residue Burial of the current residue                                                                             | numeric                |
| sea10                             | Occurring Percentage for Solvent Exposed Area less than 10 square angstrom of the current residue                                                  | numeric                |
| sea1030                           | Occurring Percentage for Solvent Exposed Area between 10 and 30 square angstrom of the current residue                                             | numeric                |
| sea30                             | Occurring Percentage for Solvent Exposed Area higher than 30 square angstrom of the current residue                                                | numeric                |
| sideChainBurial                   | Estimated Hydrophobic Effect for side chain burial of the current residue                                                                          | numeric                |
| surface                           | Surface Area of the current residue                                                                                                                | numeric                |
| volume                            | Volume of the current residue                                                                                                                      | numeric                |
| pH                                | pH at the isoelectric point of the current residue                                                                                                 | numeric                |
| corr                              | Spearman Rank Correlation of the current residue and nucleotide pair in the family alignment                                                       | numeric                |
| pvalue                            | P-value for the Spearman Rank Correlation of the current residue and nucleotide pair                                                               | numeric                |
| aa-totalCorr                      | The Sum of Correlations between the current residue and all the input nucleotides                                                                  | numeric                |
| aa-totalCorr-count                | The Count of Correlations between the current residue and all the input nucleotides                                                                | numeric                |
| aa-avgCorr                        | The Mean of Correlations between the current residue and all the input nucleotides                                                                 | numeric                |
| stat-aa-totalCorr                 | The Sum of Positive Correlations between the current residue and all the input nucleotides with P-value < 0.01                                     | numeric                |
| stat-aa-totalCorr-count           | The Count of Positive Correlations between the current residue and all the input nucleotides with P-value < 0.01                                   | numeric                |
| stat-aa-avgCorr                   | The Mean of Positive Correlations between the current residue and all the input nucleotides with P-value < 0.01                                    | numeric                |
| stat-aa-totalCorr-negative        | The Sum of Negative Correlations between the current residue and all the input nucleotides with P-value < 0.01                                     | numeric                |
| stat-aa-totalCorr-count-negative  | The Count of Negative Correlations between the current residue and all the input nucleotides with P-value < 0.01                                   | numeric                |
| stat-aa-avgCorr-negative          | The Mean of Negative Correlations between the current residue and all the input nucleotides with P-value < 0.01                                    | numeric                |
| dna-totalCorr                     | The Sum of Correlations between the current nucleotide and all the input residues                                                                  | numeric                |
| dna-totalCorr-count               | The Count of Correlations between the current nucleotide and all the input residues                                                                | numeric                |
| dna-avgCorr                       | The Mean of Correlations between the current nucleotide and all the input residues                                                                 | numeric                |
| stat-dna-totalCorr                | The Sum of Positive Correlations between the current nucleotide and all the input residues with P-value < 0.01                                     | numeric                |
| stat-dna-totalCorr-count          | The Count of Positive Correlations between the current nucleotide and all the input residues with P-value < 0.01                                   | numeric                |
| stat-dna-avgCorr                  | The Mean of Positive Correlations between the current nucleotide and all the input residues with P-value < 0.01                                    | numeric                |
| stat-dna-totalCorr-negative       | The Sum of Negative Correlations between the current nucleotide and all the input residues with P-value < 0.01                                     | numeric                |
| stat-dna-totalCorr-count-negative | The Count of Negative Correlations between the current nucleotide and all the input residues with P-value < 0.01                                   | numeric                |
| stat-dna-avgCorr-negative         | The Mean of Negative Correlations between the current nucleotide and all the input residues with P-value < 0.01                                    | numeric                |
| aa-presence                       | The Sum of Correlations between the current residue and all the possible nucleotides in the family alignment                                       | numeric                |
| aa-presence-total                 | The Sum of Correlations between all residues at the current residue's aligned position and all the possible nucleotides in the family alignment    | numeric                |
| dna-presence                      | The Sum of Correlations between the current nucleotide and all the possible residues in the family alignment                                       | numeric                |
| dna-presence-total                | The Sum of Correlations between all nucleotides at the current nucleotide's aligned position and all the possible residues in the family alignment | numeric                |
| MI                                | Discrete Mutual Information for the current residue and base pair in the family alignment                                                          | numeric                |
| advMI                             | Continuous Mutual Information for the current residue and base pair in the family alignment                                                        | numeric                |
| Mip                               | Discrete Corrected Mutual Information for the current residue and base pair in the family alignment                                                | numeric                |
| advMip                            | Continuous Corrected Mutual Information for the current residue and base pair in the family alignment                                              | numeric                |
| aa-entropy                        | Entropy of the current residue's aligned position in the family alignment                                                                          | numeric                |
| nt-entropy                        | Discrete Entropy of the current nucleotide's aligned position in the family alignment                                                              | numeric                |
| adv-nt-entropy                    | Continuous Entropy of the current nucleotide's aligned position in the family alignment                                                            | numeric                |
| polarity-entropy                  | Entropy of the current residue's aligned position in the family alignment using polarity symbols                                                   | numeric                |
| avg-hydropathyIndex               | Average Hydropathy Index of the current residue's aligned position in the family alignment                                                         | numeric                |
| avg-Ph                            | Average pH of the current residue's aligned position in the family alignment                                                                       | numeric                |
| avg-mass                          | Average Mass of the current residue's aligned position in the family alignment                                                                     | numeric                |
| aa-blosum                         | Average BLOSUM62 Score of the current residue to all the other residues at the same aligned position in the family alignment                       | numeric                |
| nt-nuc44                          | Average NUC44 Score of the current nucleotide to all the other nucleotides at the same aligned position in the family alignment                    | numeric                |
| aa-obsCount                       | The occurring fraction of non-gap residues at the current residue's aligned position in the family alignment                                       | numeric                |
| nt-obsCount                       | The occurring fraction of non-gap nucleotides at the current nucleotide's aligned position in the family alignment                                 | numeric                |
| aaMSAind                          | Aligned Position of the current residue                                                                                                            | numeric                |
| dnaMSAind                         | Aligned Position of the current nucleotide                                                                                                         | numeric                |
| aaSeqPos                          | Input Sequence Position of the current residue                                                                                                     | numeric                |
| dnaSeqPos                         | Input Sequence Position of the current nucleotide                                                                                                  | numeric                |
| class                             | Class Label to indicate whether the current residue and nucleotide pair binds or not                                                               | 'NotBinding','Binding' |

**Table S4.** List of input protein features ranked by information gain on the protein sequences of the PDB data collected.

| Rank | Information Gain | H(Class) - H(Class   Attribute) |
|------|------------------|---------------------------------|
| 1    | 0.07034          | 37 polarity_entropy             |
| 2    | 0.06724          | 39 avg_Ph                       |
| 3    | 0.05546          | 42 aa_obsCount                  |
| 4    | 0.04358          | 43 aaMSAind                     |
| 5    | 0.04337          | 35 aa_presence_total            |
| 6    | 0.04051          | 21 aa                           |
| 7    | 0.03931          | 38 avg_hydropathyIndex          |
| 8    | 0.03823          | 30 sideChainBurial              |
| 9    | 0.03823          | 26 residueBurial                |
| 10   | 0.03779          | 24 npsa                         |
| 11   | 0.03686          | 33 pH                           |
| 12   | 0.03673          | 27 sea10                        |
| 13   | 0.03478          | 31 surface                      |
| 14   | 0.03457          | 23 mass                         |
| 15   | 0.03403          | 29 sea30                        |
| 16   | 0.03179          | 32 volume                       |
| 17   | 0.03162          | 28 sea1030                      |
| 18   | 0.03083          | 40 avg_mass                     |
| 19   | 0.03029          | 36 aa_entropy                   |
| 20   | 0.02437          | 22 hydropathyIndex              |
| 21   | 0.0241           | 41 aa_blosum                    |
| 22   | 0.02152          | 44 aaSeqPos                     |
| 23   | 0.02054          | 2 aa-9                          |
| 24   | 0.01969          | 8 aa-3                          |
| 25   | 0.0193           | 25 polarity                     |
| 26   | 0.01772          | 3 aa-8                          |
| 27   | 0.01732          | 34 aa_presence                  |
| 28   | 0.01643          | 5 aa-6                          |
| 29   | 0.01587          | 6 aa-5                          |
| 30   | 0.01574          | 7 aa-4                          |
| 31   | 0.01485          | 15 aa5                          |
| 32   | 0.01452          | 9 aa-2                          |
| 33   | 0.01423          | 10 aa-1                         |
| 34   | 0.01396          | 1 aa-10                         |
| 35   | 0.01269          | 20 aa10                         |
| 36   | 0.01267          | 17 aa7                          |
| 37   | 0.01195          | 4 aa-7                          |
| 38   | 0.01017          | 13 aa3                          |
| 39   | 0.01006          | 19 aa9                          |
| 40   | 0.0096           | 11 aa1                          |
| 41   | 0.00777          | 12 aa2                          |
| 42   | 0.00747          | 16 aa6                          |
| 43   | 0.00733          | 14 aa4                          |
| 44   | 0.0054           | 18 aa8                          |

**Table S5.** List of input protein and DNA features ranked by information gain on the PDB data collected.

| Rank | Information Gain | H(Class) - H(Class   Attribute) | Rank | Information Gain | H(Class) - H(Class   Attribute)      |
|------|------------------|---------------------------------|------|------------------|--------------------------------------|
| 1    | 0.028965         | 74 aa_entropy                   | 44   | 0.0023444        | 70 MI                                |
| 2    | 0.0254295        | 77 polarity_entropy             | 45   | 0.0022853        | 75 nt_entropy                        |
| 3    | 0.0163194        | 79 avg_Ph                       | 46   | 0.0022479        | 20 aa10                              |
| 4    | 0.0158909        | 78 avg_hydrophathyIndex         | 47   | 0.0021737        | 62 stat_dna_avgCorr                  |
| 5    | 0.0150191        | 80 avg_mass                     | 48   | 0.0021431        | 17 aa7                               |
| 6    | 0.0143294        | 85 aaMSAind                     | 49   | 0.0021398        | 59 dna_avgCorr                       |
| 7    | 0.0115361        | 81 aa_blosum                    | 50   | 0.0020943        | 11 aa1                               |
| 8    | 0.0103267        | 83 aa_obsCount                  | 51   | 0.0020257        | 65 stat_dna_avgCorr_negative         |
| 9    | 0.0091675        | 33 aa_nt                        | 52   | 0.001982         | 46 corr                              |
| 10   | 0.0088123        | 67 aa_presence_total            | 53   | 0.0019657        | 13 aa3                               |
| 11   | 0.0082388        | 31 aa                           | 54   | 0.0019346        | 76 adv_nt_entropy                    |
| 12   | 0.0080512        | 45 pH                           | 55   | 0.0018553        | 50 aa_avgCorr                        |
| 13   | 0.007936         | 38 residueBurial                | 56   | 0.0017471        | 12 aa2                               |
| 14   | 0.007936         | 42 sideChainBurial              | 57   | 0.0016383        | 82 nt_nuc44                          |
| 15   | 0.0079193        | 41 sea30                        | 58   | 0.0016214        | 19 aa9                               |
| 16   | 0.0078905        | 44 volume                       | 59   | 0.0015827        | 14 aa4                               |
| 17   | 0.0078723        | 35 mass                         | 60   | 0.0015735        | 86 dnaMSAind                         |
| 18   | 0.0076877        | 43 surface                      | 61   | 0.0013169        | 60 stat_dna_totalCorr                |
| 19   | 0.0075964        | 36 npsa                         | 62   | 0.0012158        | 68 dna_presence                      |
| 20   | 0.0074838        | 39 sea10                        | 63   | 0.0011903        | 57 dna_totalCorr                     |
| 21   | 0.0072399        | 40 sea1030                      | 64   | 0.0010989        | 16 aa6                               |
| 22   | 0.0063895        | 34 hydrophathyIndex             | 65   | 0.0010665        | 18 aa8                               |
| 23   | 0.0059628        | 69 dna_presence_total           | 66   | 0.0010046        | 23 nt-3                              |
| 24   | 0.0059197        | 87 aaSeqPos                     | 67   | 0.0009317        | 24 nt-2                              |
| 25   | 0.0053562        | 53 stat_aa_avgCorr              | 68   | 0.0009205        | 27 nt2                               |
| 26   | 0.0051385        | 58 dna_totalCorr_count          | 69   | 0.0009049        | 28 nt3                               |
| 27   | 0.0048563        | 66 aa_presence                  | 70   | 0.000891         | 51 stat_aa_totalCorr                 |
| 28   | 0.0041991        | 37 polarity                     | 71   | 0.000865         | 52 stat_aa_totalCorr_count           |
| 29   | 0.0040737        | 8 aa-3                          | 72   | 0.0008573        | 54 stat_aa_totalCorr_negative        |
| 30   | 0.0040557        | 2 aa-9                          | 73   | 0.0007884        | 26 nt1                               |
| 31   | 0.0040007        | 84 nt_obsCount                  | 74   | 0.0006983        | 25 nt-1                              |
| 32   | 0.0039398        | 88 dnaSeqPos                    | 75   | 0.0006965        | 22 nt-4                              |
| 33   | 0.0037361        | 48 aa_totalCorr                 | 76   | 0.0006128        | 47 pvalue                            |
| 34   | 0.0037097        | 5 aa-6                          | 77   | 0.0006032        | 64 stat_dna_totalCorr_count_negative |
| 35   | 0.0034294        | 49 aa_totalCorr_count           | 78   | 0.0005763        | 29 nt4                               |
| 36   | 0.0033629        | 6 aa-5                          | 79   | 0.0005462        | 63 stat_dna_totalCorr_negative       |
| 37   | 0.0033307        | 7 aa-4                          | 80   | 0.0005428        | 56 stat_aa_avgCorr_negative          |
| 38   | 0.0032274        | 3 aa-8                          | 81   | 0.0003977        | 21 nt-5                              |
| 39   | 0.0030469        | 10 aa-1                         | 82   | 0.0003533        | 30 nt5                               |
| 40   | 0.0029861        | 9 aa-2                          | 83   | 0.0002316        | 72 MIp                               |
| 41   | 0.002966         | 15 aa5                          | 84   | 0.0002113        | 61 stat_dna_totalCorr_count          |
| 42   | 0.002596         | 1 aa-10                         | 85   | 0.0001517        | 32 nt                                |
| 43   | 0.0023513        | 4 aa-7                          | 86   | 0.0000885        | 55 stat_aa_totalCorr_count_negative  |

**Table S6.** Comparison between the top 25 scoring 8-mers predicted and the top 25 8-mers with the highest median binding intensities measured by Protein Binding Microarray (PBM) (3)

| Predicted  | PBM Replicate 1 (3) | PBM Replicate 2 (3) |
|------------|---------------------|---------------------|
| 'ACAGGTGC' | 'ACACCTGC'          | 'ACAGGTGC'          |
| 'ACAGGTGG' | 'GCAGGTGT'          | 'GCACCTGT'          |
| 'CCAGGTGC' | 'CACCTGCA'          | 'CGCACCTG'          |
| 'CCAGGTGG' | 'TGCAGGTG'          | 'CAGGTGCG'          |
| 'GCAGGTGC' | 'CCACCTGC'          | 'CACCTGTG'          |
| 'GCAGGTGG' | 'GCAGGTGG'          | 'CACAGGTG'          |
| 'TCAGGTGC' | 'GCACCTGT'          | 'GCACCTGG'          |
| 'TCAGGTGG' | 'ACAGGTGC'          | 'CCAGGTGC'          |
| 'ACATGTGC' | 'AACACCTG'          | 'GCAGGTGT'          |
| 'ACATGTGG' | 'CAGGTGTT'          | 'ACACCTGC'          |
| 'CCATGTGC' | 'CACCTGCG'          | 'CGCAGGTG'          |
| 'CCATGTGG' | 'CGCAGGTG'          | 'CACCTGCG'          |
| 'GCATGTGC' | 'CGCACCTG'          | 'CACACCTG'          |
| 'GCATGTGG' | 'CAGGTGCG'          | 'CAGGTGTG'          |
| 'TCATGTGC' | 'CACCTGTG'          | 'GCAGGTGG'          |
| 'TCATGTGG' | 'CACAGGTG'          | 'CCACCTGC'          |
| 'ACAGTTGC' | 'CACACCTG'          | 'CAGGTGCT'          |
| 'ACAGTTGG' | 'CAGGTGTG'          | 'AGCACCTG'          |
| 'CCAGTTGC' | 'ACACCTGG'          | 'AACACCTG'          |
| 'CCAGTTGG' | 'CCAGGTGT'          | 'CAGGTGTT'          |
| 'GCAGTTGC' | 'GCACCTGC'          | 'CCAGGTGT'          |
| 'GCAGTTGG' | 'GCAGGTGC'          | 'ACACCTGG'          |
| 'TCAGTTGC' | 'TGCACCTG'          | 'GCAGGTGC'          |
| 'TCAGTTGG' | 'CAGGTGCA'          | 'GCACCTGC'          |
| 'ACATTTGC' | 'CACCTGCT'          | 'CACCTGGT'          |

**S14** *Nucleic Acids Research*, 2009, Vol. 37, No. 12

## REFERENCES

1. Edgar, R. C. (2004) MUSCLE: multiple sequence alignment with high accuracy and high throughput. *Nucleic Acids Res.*, **32**(5), 1792–1797.
2. Bateman, A., Coin, L., Durbin, R., Finn, R. D., Hollich, V., GrifRths-Jones, S., Khanna, A., Marshall, M., Moxon, S., Sonnhammer, E. L. L., Studholme, D. J., Yeats, C., and Eddy, S. R. (2004) The Pfam protein families database. *Nucleic Acids Res.*, **32**, D138–141.
3. Robasky, K. and Bulyk, M. L. (Jan, 2011) UniPROBE, update 2011: expanded content and search tools in the online database of protein-binding microarray data on protein-DNA interactions. *Nucleic Acids Res.*, **39**, D124–128.
